# Supplementary material
Source: publisher figshare collection journal article supplement (https://frontiersin.figshare.com/ndownloader/files/13235750)
Supplement: Supplementary file [file 13235750]

## Supplemental Figure 1

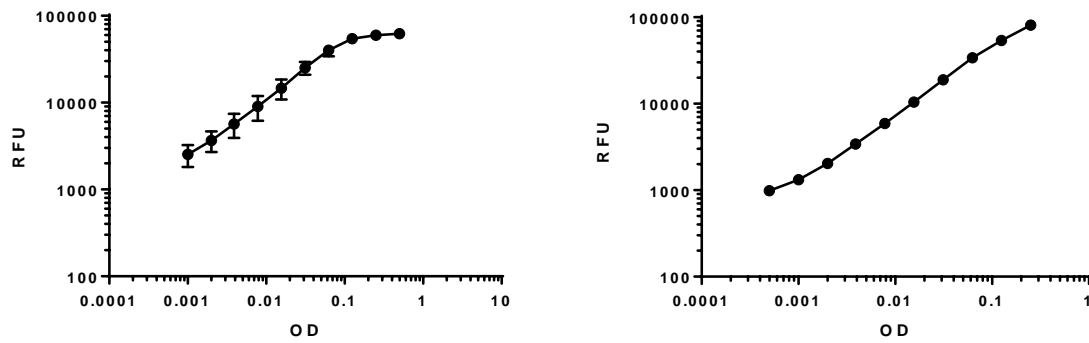

**Replicates of Figure 2A.** alamarBlue turnover was measured in nutrient-starved *M. abscessus* in 2-fold dilutions beginning at an OD<sub>590</sub> of 0.5 (left) or 0.25 (right) to test for linearity of the assay.

## Supplemental Figure 2

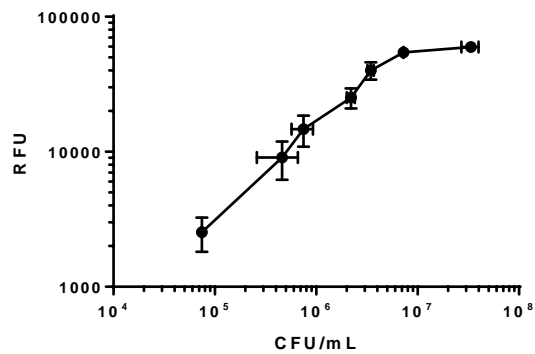

**Replicate of Figure 2B.** Nutrient-starved *M. abscessus* was serially 2-fold beginning at an OD<sub>590</sub> of 0.25. Viable bacteria as measured by CFUs was correlated to alamarBlue turnover by RFUs.
